# Supplementary material
Source: PubMed Central journal article supplement (PMC8889436)
Supplement: NIHMS1777423-supplement-Supp_Table.pdf [file NIHMS1777423-supplement-Supp_Table.pdf]

# **Effectiveness of 1, 2, and 3 Doses of Human Papillomavirus Vaccine Against High-Grade Cervical Lesions Positive for Human Papillomaviruses 16 and 18**

Michelle L. Johnson Jones, Julia Warner Gargano, Melissa Powell, Ina U. Park, Linda M. Niccolai, Nancy M. Bennett, Marie R. Griffin, Troy Querec, Elizabeth R. Unger, and Lauri E. Markowitz for the HPV-IMPACT Working Group

## Table of Contents

Web Table 1

**Web Table 1.** Vaccination History of CIN2+ Cases With and Without HPV-16/18, Unadjusted and Adjusted Odds Ratios, and Vaccine Effectiveness (VE), Human Papillomavirus Vaccine Impact Monitoring Project (HPV-IMPACT), United States, 2008–2014

| Cohort, Length of Buffer <sup>c</sup> ,<br>and No. of Doses | HPV-16/18–<br>Positive,<br>CIN2+ |      | HPV-16/18–<br>Negative <sup>a</sup> ,<br>CIN2+ |      | OR   | 95% CI     | aOR <sup>b</sup> | 95% CI     | VE,<br>% |
|-------------------------------------------------------------|----------------------------------|------|------------------------------------------------|------|------|------------|------------------|------------|----------|
|                                                             | No.                              | %    | No.                                            | %    |      |            |                  |            |          |
| All women in main analysis<br>( <i>n</i> = 3,300)           |                                  |      |                                                |      |      |            |                  |            |          |
| 24 months                                                   |                                  |      |                                                |      |      |            |                  |            |          |
| 0                                                           | 1406                             | 90.1 | 1325                                           | 76.2 | 1.00 | Referent   | 1.00             | Referent   |          |
| 1                                                           | 47                               | 3.0  | 89                                             | 5.1  | 0.50 | 0.35, 0.71 | 0.53             | 0.37, 0.76 | 47       |
| 2                                                           | 35                               | 2.2  | 73                                             | 4.2  | 0.45 | 0.30, 0.68 | 0.45             | 0.30, 0.69 | 55       |
| 3                                                           | 73                               | 4.7  | 252                                            | 14.5 | 0.27 | 0.21, 0.36 | 0.26             | 0.20, 0.35 | 74       |
| Cohort born in 1987–1994<br>( <i>n</i> = 1,149)             |                                  |      |                                                |      |      |            |                  |            |          |
| 24 months                                                   |                                  |      |                                                |      |      |            |                  |            |          |
| 0                                                           | 418                              | 86.9 | 417                                            | 62.4 | 1.00 | Referent   | 1.00             | Referent   |          |
| 1                                                           | 20                               | 4.2  | 51                                             | 7.6  | 0.39 | 0.23, 0.67 | 0.41             | 0.24, 0.70 | 59       |
| 2                                                           | 16                               | 3.3  | 44                                             | 6.6  | 0.36 | 0.20, 0.65 | 0.36             | 0.20, 0.66 | 64       |
| 3                                                           | 27                               | 5.6  | 156                                            | 23.4 | 0.17 | 0.11, 0.27 | 0.17             | 0.11, 0.27 | 83       |
| Cohort born in 1979–1986<br>( <i>n</i> = 2,151)             |                                  |      |                                                |      |      |            |                  |            |          |
| 24 months                                                   |                                  |      |                                                |      |      |            |                  |            |          |
| 0                                                           | 988                              | 91.5 | 908                                            | 84.8 | 1.00 | Referent   | 1.00             | Referent   |          |
| 1                                                           | 27                               | 2.5  | 38                                             | 3.5  | 0.65 | 0.40, 1.08 | 0.69             | 0.41, 1.15 | 31       |
| 2                                                           | 19                               | 1.8  | 29                                             | 2.7  | 0.60 | 0.34, 1.08 | 0.56             | 0.31, 1.02 | 44       |
| 3                                                           | 46                               | 4.3  | 96                                             | 9.0  | 0.44 | 0.31, 0.63 | 0.41             | 0.28, 0.59 | 59       |
| All women in main analysis<br>( <i>n</i> = 3,300)           |                                  |      |                                                |      |      |            |                  |            |          |
| 1 month                                                     |                                  |      |                                                |      |      |            |                  |            |          |
| 0                                                           | 1223                             | 78.3 | 1145                                           | 65.8 | 1.00 | Referent   | 1.00             | Referent   |          |
| 1                                                           | 82                               | 5.3  | 113                                            | 6.5  | 0.68 | 0.51, 0.91 | 0.70             | 0.51, 0.94 | 30       |
| 2                                                           | 73                               | 4.7  | 110                                            | 6.3  | 0.62 | 0.46, 0.84 | 0.61             | 0.45, 0.83 | 39       |
| 3                                                           | 183                              | 11.7 | 371                                            | 21.3 | 0.46 | 0.38, 0.56 | 0.44             | 0.36, 0.54 | 56       |
| All women in main analysis<br>( <i>n</i> = 3,300)           |                                  |      |                                                |      |      |            |                  |            |          |
| 12 months                                                   |                                  |      |                                                |      |      |            |                  |            |          |
| 0                                                           | 1317                             | 84.4 | 1221                                           | 70.2 | 1.00 | Referent   | 1.00             | Referent   |          |
| 1                                                           | 62                               | 4.0  | 116                                            | 6.7  | 0.50 | 0.36, 0.68 | 0.50             | 0.36, 0.69 | 50       |
| 2                                                           | 66                               | 4.2  | 89                                             | 5.1  | 0.69 | 0.50, 0.95 | 0.69             | 0.50, 0.97 | 31       |
| 3                                                           | 116                              | 7.4  | 313                                            | 18.0 | 0.34 | 0.27, 0.43 | 0.33             | 0.26, 0.41 | 67       |

|                                                                                     |      |      |      |      |      |            |      |            |    |  |
|-------------------------------------------------------------------------------------|------|------|------|------|------|------------|------|------------|----|--|
| All women in main analysis<br>( <i>n</i> = 3,300)                                   |      |      |      |      |      |            |      |            |    |  |
| 36 months                                                                           |      |      |      |      |      |            |      |            |    |  |
| 0                                                                                   | 1461 | 93.6 | 1416 | 81.4 | 1.00 | Referent   | 1.00 | Referent   |    |  |
| 1                                                                                   | 29   | 1.9  | 78   | 4.5  | 0.36 | 0.23, 0.56 | 0.36 | 0.23, 0.56 | 64 |  |
| 2                                                                                   | 31   | 2.0  | 51   | 2.9  | 0.59 | 0.38, 0.93 | 0.62 | 0.39, 0.99 | 38 |  |
| 3                                                                                   | 40   | 2.6  | 194  | 11.2 | 0.20 | 0.14, 0.28 | 0.19 | 0.13, 0.27 | 81 |  |
| Women with interval doses<br>excluded ( <i>n</i> = 2,841)                           |      |      |      |      |      |            |      |            |    |  |
| 24 months                                                                           |      |      |      |      |      |            |      |            |    |  |
| 0                                                                                   | 1223 | 91.4 | 1145 | 76.2 | 1.00 | Referent   | 1.00 | Referent   |    |  |
| 1                                                                                   | 24   | 1.8  | 66   | 4.4  | 0.34 | 0.21, 0.55 | 0.35 | 0.22, 0.57 | 65 |  |
| 2                                                                                   | 18   | 1.3  | 40   | 2.7  | 0.42 | 0.24, 0.74 | 0.43 | 0.24, 0.75 | 57 |  |
| 3                                                                                   | 73   | 5.5  | 252  | 16.8 | 0.27 | 0.21, 0.36 | 0.25 | 0.19, 0.34 | 75 |  |
| Women with unknown<br>vaccination assumed to be<br>unvaccinated ( <i>n</i> = 6,956) |      |      |      |      |      |            |      |            |    |  |
| 24 months                                                                           |      |      |      |      |      |            |      |            |    |  |
| 0                                                                                   | 3295 | 95.5 | 3092 | 88.2 | 1.00 | Referent   | 1.00 | Referent   |    |  |
| 1                                                                                   | 47   | 1.4  | 89   | 2.5  | 0.50 | 0.35, 0.71 | 0.52 | 0.36, 0.75 | 48 |  |
| 2                                                                                   | 35   | 1.0  | 73   | 2.1  | 0.45 | 0.30, 0.68 | 0.47 | 0.31, 0.70 | 53 |  |
| 3                                                                                   | 73   | 2.1  | 252  | 7.2  | 0.27 | 0.21, 0.35 | 0.27 | 0.21, 0.36 | 73 |  |
| Women with multiple HPV<br>types detected excluded<br>( <i>n</i> = 2,585)           |      |      |      |      |      |            |      |            |    |  |
| 24 months                                                                           |      |      |      |      |      |            |      |            |    |  |
| 0                                                                                   | 1052 | 89.8 | 1081 | 76.5 | 1.00 | Referent   | 1.00 | Referent   |    |  |
| 1                                                                                   | 35   | 3.0  | 64   | 4.5  | 0.56 | 0.37, 0.86 | 0.59 | 0.39, 0.91 | 41 |  |
| 2                                                                                   | 30   | 2.6  | 57   | 4.0  | 0.54 | 0.35, 0.85 | 0.55 | 0.35, 0.86 | 45 |  |
| 3                                                                                   | 55   | 4.7  | 211  | 14.9 | 0.27 | 0.20, 0.37 | 0.25 | 0.18, 0.34 | 75 |  |

Abbreviations: aOR, adjusted odds ratio; CI, confidence interval; CIN2+, cervical intraepithelial neoplasia grades 2, 2/3, or 3 and adenocarcinoma in situ; HPV, human papillomavirus; OR, odds ratio; VE, vaccine effectiveness.

<sup>a</sup> HPV-16/18–negative includes lesions with other HPV types or no types detected.

<sup>b</sup> Adjusted for site, race/ethnicity, and insurance status.

<sup>c</sup> Buffer was defined as the time between the date of the first vaccine dose and the date of the screening test that led to CIN2+ diagnosis.
